# Supplementary material for: First trigonal-antiprismatic tris-dichloroglyoximate iron(ii) clathrochelate and its reactivity in nucleophilic substitution reactions
Source: Royal Society of Chemistry journal article supplement (doi:10.1039/b211623e), 2003-01-01
Supplement: b211623e.pdf [file b211623e.pdf]

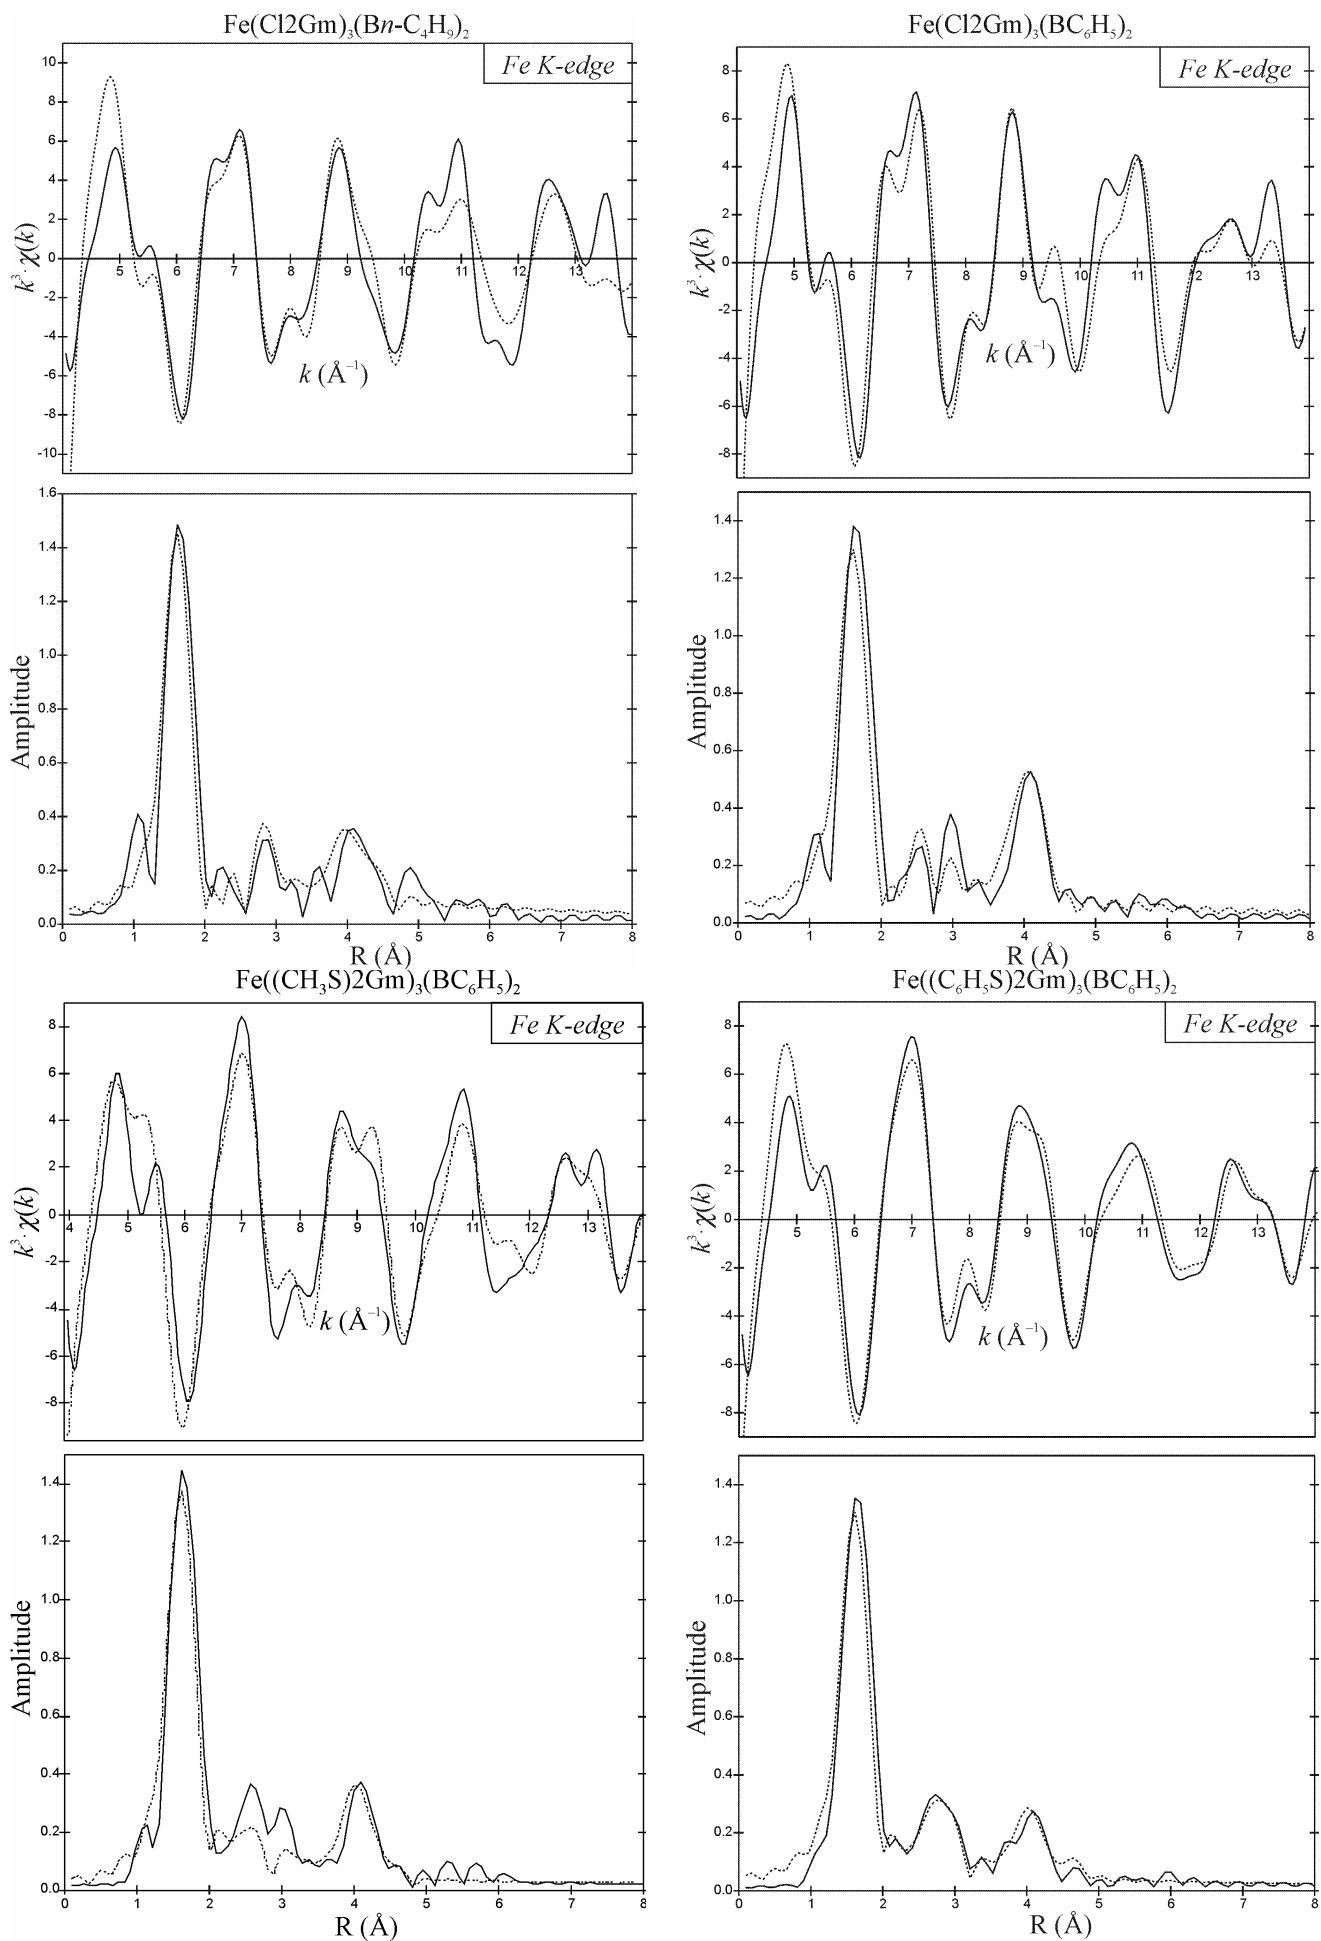

EXAFS oscillations  $k^2\chi(k)$  and RDA curves of boron-capped iron(II) clathrochelates with known structure. The experimental (—) and calculated (-----) curves are shown.  
 $[\text{Fe}(\text{Cl}_2\text{Gm})_3(\text{SnCl}_3)_2]^{2-}$

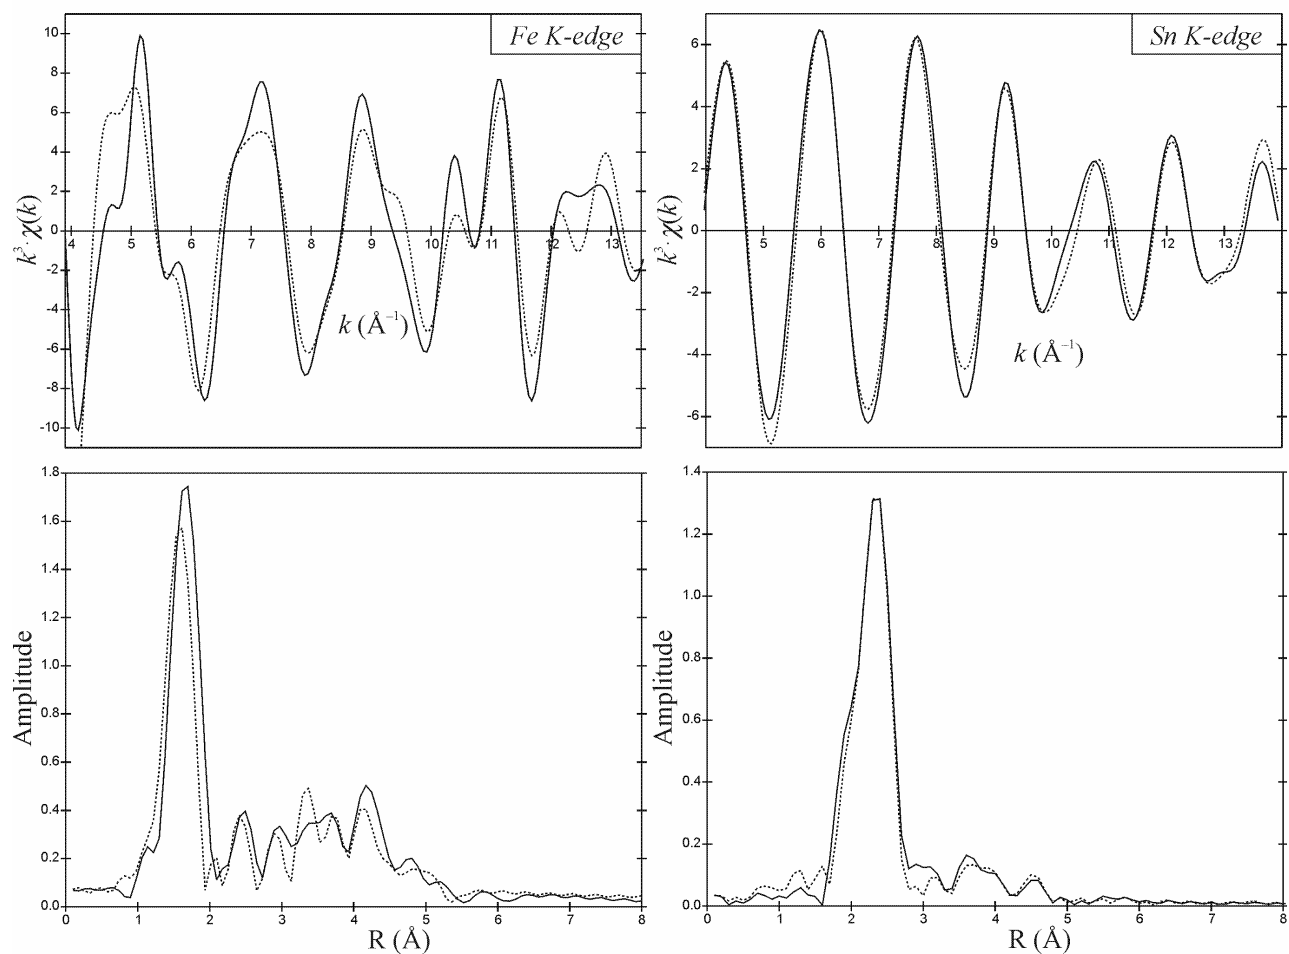

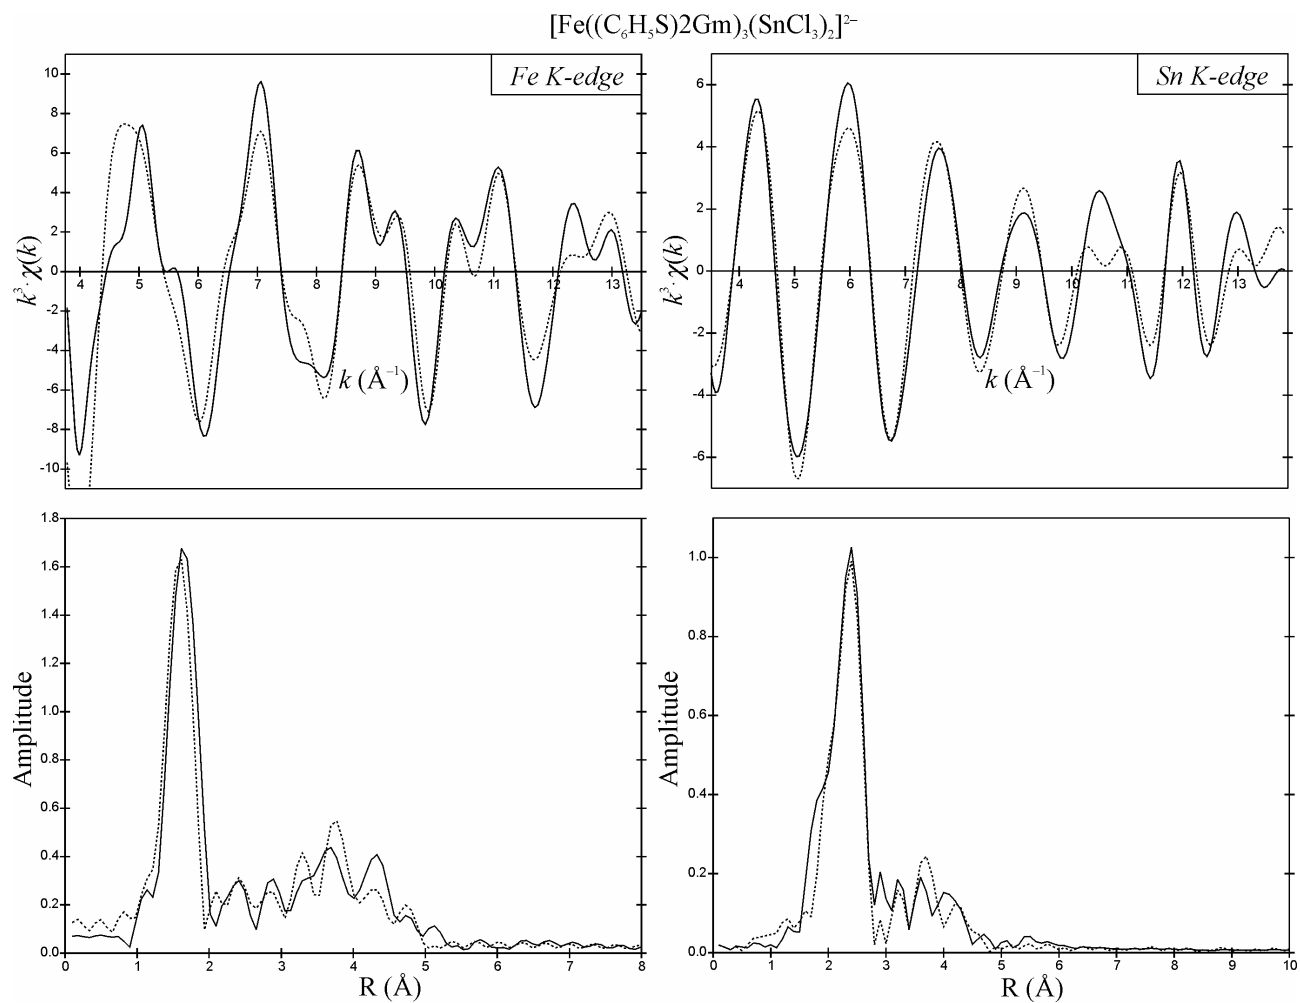

EXAFS oscillations  $k^2\chi(k)$  and RDA curves of tin-capped iron(II) clathrochelates obtained. The experimental (—) and calculated (-----) curves are shown.
